# Supplementary material for: Effect of Lifestyle Coaching or Enhanced Pharmacotherapy on Blood Pressure Control Among Black Adults With Persistent Uncontrolled Hypertension: A Cluster Randomized Clinical Trial
Source: PubMed Central journal article supplement (PMC9118047; doi:10.1001/jamanetworkopen.2022.12397), 2022-05-18
Supplement: jamanetwopen-e2212397-s00.pdf [file jamanetwopen-e2212397-s00.pdf]

## Data Sharing Statement

Nguyen-Huynh. Effect of Lifestyle Coaching or Enhanced Pharmacotherapy on Blood Pressure Control Among Black Adults With Persistent Uncontrolled Hypertension. *JAMA Netw Open*. Published May 18, 2022. doi:10.1001/jamanetworkopen.2022.12397

### Data

**Data available:** No

### Additional Information

**Explanation for why data not available:** if asked, may be considered on a case by case basis.
